# Supplementary material
Source: publisher site journal article supplement (https://www.dovepress.com/article/429352)
Supplement: Supplementary file 1 [file get_supplementary_file.php]

| **Supplementary Table S1. Characteristics and certainty of evidence estimates for the main outcome** | | | | | | | |
| --- | --- | --- | --- | --- | --- | --- | --- |
| **Outcome Author, year** | **Sample size (TACE+Sora)** | **Sample size (TACE)** | **Relative effect (95%CI)** | **I-squared** | **I-squared P-value** | **certainty** | **Combined Certainty** |
| **OS** |  |  | **HR (95%CI)** |  |  |  |  |
| Yang M 2014[44] | 520 | 601 | 0.64(0.43–0.97) | 67% | 0.02 | Very Lowa,b | low |
| Zhang L 2014 [39] | 533 | 659 | 0.65(0.47-0.89) | 58% | 0.048 | Very Lowa,b |
| Hu M 2016 [35] | 324 | 423 | 0.76(0.47-1.05) | 48% | 0.147 | Lowa |
| Zeng J 2016 [38] | 383 | 382 | 0.97(0.72-1.29) | 0% | 0.582 | Highc |
| Zhang X 2017 [41] | 212 | 710 | 0.62(0.51–0.75) | 30% | 0.23 | lowd |
| Jin P 2018 [42] | 928 | 1183 | 0.61(0.49-0.77) | 67% | 0.001 | Very Lowa,b |
| Li L 2018 [40] | 761 | 1072 | 0.63(0.55–0.71) | 49% | 0.058 | Lowa |
| Li D 2021 [34] | 775 | 769 | 0.86(0.73-1.02) | 16% | 0.31 | High c |
|  |  |  | **OR (95%CI)** |  |  |  |  |
| Cai R 2017 [45] | 950 | 924 | 2.05(1.59-2.65) | 31% | 0.13 | Lowa |  |
|  |  |  | **SMD (95%CI)** |  |  |  |  |
| Cheng Z 2020 [37] | 746 | 1238 | 2.54(1.74-3.34) | 98% | ＜0.001 | Very Lowa,e |  |
| **0.5-year survival rate** | | | **OR (95%CI)** |  |  |  |  |
| Cai R 2017 [45] | 436 | 423 | 2.6(1.57-4.29) | 0% | 0.85 | Lowa | low |
| Zhang X 2017 [41] | 238 | 735 | 3.47(2.47-4.89) | 0% | 0.5 | Lowd |
| **1-year survival rate** | | |  |  |  |  |  |
| Cheng Z 2020 [37] | 474 | 664 | 2.96(1.71-5.14) | 53% | 0.04 | Very Lowa,b | Very Low |
| Cai R 2017 [45] | 514 | 501 | 1.88(1.39-2.53) | 56% | 0.02 | Very Lowa,b |
| Zhang X 2017 [41] | 238 | 735 | 3.1(2.22-4.33) | 41% | 0.15 | Lowd |
| **2-year survival rate** | | |  |  |  |  |  |
| Cheng Z 2020 [37] | 324 | 342 | 1.64(1.18-2.28) | 33% | 0.21 | Lowa | low |
| **TTP** |  |  | **HR (95%CI)** |  |  |  |  |
| Yang M 2014[44] | 496 | 577 | 0.74(0.61-0.90) | 33% | 0.21 | Lowa | Moderate |
| Zhang L 2014 [39] | 506 | 615 | 0.68(0.52–0.87) | 62% | 0.033 | Very Lowa,b |
| Hu M 2016 [35] | 342 | 424 | 0.75(0.48-1.03) | 83% | 0.003 | Very Lowa,e |
| Zeng J 2016 [38] | 438 | 439 | 0.77(0.64-0.92) | 11% | 0.338 | High c |
| Jin P 2018 [42] | 727 | 858 | 0.8(0.62-1.05) | 71% | 0.002 | Lowa |
| Li L 2018 [40] | 742 | 1053 | 0.66(0.50–0.81) | 66% | 0.002 | Very Lowa,b |
| Xie Y 2021 [36] | 745 | 671 | 0.94(0.84-1.05) | 65% | 0.01 | Modbrctbc,b |
| Li D 2021 [34] | 675 | 671 | 0.8(0.70-0.92) | 35% | 0.17 | High c |
|  |  |  | **SMD (95%CI)** |  |  |  |
| Cheng Z 2020 [37] | 336 | 414 | 2.49(0.87-4.12) | 99% | ＜0.001 | Very Lowa,e |
| **ORR** |  |  | **OR (95%CI)** |  |  |  |  |
| Fu Q 2014 [43] | 72 | 75 | 2.56(1.28-5.26) | 0% | 0.55 | Lowa |  |
| Zhang X 2017 [41] | 125 | 131 | 3.59(1.74-7.39) | 21% | 0.28 | Lowd |  |
| Cheng Z 2020 [37] | 537 | 574 | 2.61(1.43-4.77) | 65% | 0.006 | Very Lowa,b |  |
|  |  |  | **RR (95%CI)** |  |  |  |  |
| Yang M 2014[44] | 246 | 327 | 1.44(1.03-2.0) | 20% | 0.28 | Lowa | Moderate |
| Zhang L 2014 [39] | 246 | 355 | 1.06(1.01-1.12) | 0% | 0.873 | Lowa |
| Zeng J 2016 [38] | 178 | 179 | 1.2(0.88-1.64) | 0% | 0.32 | High c |
| Cai R 2017 [45] | 610 | 602 | 1.62(1.34-1.94) | 0% | 0.69 | Lowa |
| Xie Y 2021 [36] | 335 | 335 | 1.17(0.94-1.46) | 0% | 0.629 | High c |
| Li D 2021 [34] | 1282 | 1274 | 1.35(1.24-1.48) | 23% | 0.17 | High c |
|  |  |  | **HR(95%CI)** |  |  |  |  |
| Jin P 2018 [42] | 483 | 603 | 1.11(0.58-2.13) | 87% | ＜0.001 | Very Lowa,e |  |
| **DCR** |  |  | **OR(95%CI)** |  |  |  |  |
| Zhang X 2017 [41] | 125 | 131 | 4.72(1.75-12.72) | 56% | 0.08 | Very Lowa,b |  |
| Li L 2018 [40] | 375 | 532 | 2.93(1.59-5.41) | — | — | Lowa |  |
|  |  |  | **RR(95%CI)** |  |  |  |  |
| Zeng J 2016 [38] | 178 | 179 | 1.04(0.90-1.20) | 3% | 0.311 | High c | Moderate |
| Cai R 2017 [45] | 610 | 602 | 1.43(1.26-1.62) | 55% | 0.009 | Very Lowa,b |
| Xie Y 2021 [36] | 335 | 335 | 1.00(0.91-1.10) | 0% | 0.485 | High c |
| Li D 2021 [34] | 1282 | 1274 | 1.19(1.11-1.28) | 60% | 0.0003 | Moderatec,b |
|  |  |  | **HR(95%CI)** |  |  |  |  |
| Jin P 2018 [42] | 483 | 603 | 1.30(1.00-1.69) | 85% | ＜0.001 | Very Lowa,e |  |

Notes: a, Both RCTs and None-RCTs were included in meta-analyses; b , Inconsistency(small P value from a test for heterogeneity or a high I2 value, 50%＜I2≤75%); c, All Meta-analyses included only RCTs; d: Only observational studies were included in meta-analyses; e, All Meta-analyses included only RCTs; OS: overall survival; HR: hazard ratio; RR: risk ratio; OR: odd ratio; TTP: time to progression; DCR: disease control rate; ORR: objective response rate; TACE: transarterial chemoembolization; CI: confidence interval.

| **Supplementary Table S2. Characteristics and certainty of evidence estimates for adverse events** | | | | | | |
| --- | --- | --- | --- | --- | --- | --- |
| **Outcome Author, year** | **Number studies** | **RR (95%CI)** | **I-squared** | **I-squared P-value** | **Certainty** | **Combined**  **Certainty** |
| **All grade adverse event** | |  |  |  |  |  |
| **Fatigue** |  |  |  |  |  |  |
| Li D 2021 [34] | 10 | 1.17(1.05-1.31) | 36.0% | 0.12 | Higha | Moderate |
| Zeng J 2016 [38] | 3 | 1.34(1.02-1.76) | 0.0% | 0.386 | Higha |
| Jin P 2018 [42] | 5 | 1.25(0.89-1.76) | 57.5% | 0.052 | Very Lowb,c |
| Yang M 2014 [44] | 4 | 7.86(1.11-55.68) | 87.0% | 0.0001 | Very Lowb,d |
| Cai R 2017 [45] | 5 | 1.25(1.05-1.48) | 0.0% | 0.59 | Lowb |
| **Nausea** |  |  |  |  |  |  |
| Li D 2021 [34] | 5 | 1.00(0.82-1.22) | 28.0% | 0.24 | Higha | low |
| Yang M 2014 [44] | 3 | 2.34(0.49-11.19) | 73.0% | 0.02 | Very Lowb,c |
| **Alopecia** |  |  |  |  |  |  |
| Li D 2021 [34] | 11 | 2.01(0.98-4.13) | 86.0% | 0.00001 | Lowa,d | low |
| Jin P 2018 [42] | 6 | 4.88(1.67-14.13) | 81.7% | 0.00 | Lowb |
| Yang M 2014 [44] | 5 | 32.39(9.39111.71) | 25.0% | 0.26 | Very Lowb,c |
| **Hand-Foot skin reaction** | |  |  |  |  |  |
| Li D 2021 [34] | 17 | 6.87(2.66-17.71) | 97.0% | 0.00001 | Lowa,d | low |
| Zeng J 2016 [38] | 4 | 9.6(6.64-13.89) | 0.0% | 0.624 | Higha |
| Jin P 2018 [42] | 8 | 7.03(4.77-10.37) | 37.8% | 0.128 | Lowb |
| Yang M 2014 [44] | 6 | 14.12(5.81-34.36) | 52.0% | 0.07 | Very Lowb,c |
| Cai R 2017 [45] | 7 | 9.83(6.12-15.81) | 0.0% | 0.84 | Lowb |
| **Rash** |  |  |  |  |  |  |
| Li D 2021 [34] | 9 | 2.56(1.67-3.93) | 62.0% | 0.007 | Moderatea,c | low |
| Zeng J 2016 [38] | 3 | 3.64(2.59-5.12) | 0.0% | 0.709 | Higha |
| Jin P 2018 [42] | 5 | 2.87(1.86-4.43) | 49.9% | 0.092 | Lowb |
| Yang M 2014 [44] | 4 | 5.68(2.64-12.20) | 38.0% | 0.19 | Lowb |
| Cai R 2017 [45] | 6 | 3.92(2.58-5.94) | 43.0% | 0.12 | Lowb |
| **Hematological events** | |  |  |  |  |  |
| Jin P 2018 [42] | 4 | 3.14(0.99-10.01) | 92.0% | 0.00 | Very Lowb,d | Very Low |
| Yang M 2014 [44] | 3 | 2.16(0.45-10.46) | 72.0% | 0.03 | Very Lowb,c |
| **Diarrhea** |  |  |  |  |  |  |
| Li D 2021 [34] | 14 | 2.49(1.65-3.74) | 77.0% | 0.00 | Lowa,d | low |
| Zeng J 2016 [38] | 4 | 3.54(2.05-6.14) | 52.4% | 0.098 | Moderatea,c |
| Jin P 2018 [42] | 8 | 2.75(1.74-4.35) | 78.0% | 0.00 | Very Lowb,d |
| Yang M 2014 [44] | 5 | 6.75(2.34-19.50) | 71.0% | 0.008 | Very Lowb,c |
| Cai R 2017 [45] | 7 | 3.35(2.48-4.52) | 0.0% | 0.84 | Lowb |
| **Hypertension** |  |  |  |  |  |  |
| Li D 2021 [34] | 12 | 1.99(1.31-3.03) | 64.0% | 0.001 | Moderatea,c | low |
| Zeng J 2016 [38] | 3 | 2.46(1.20-5.04) | 74.5% | 0.02 | Moderatea,c |
| Jin P 2018 [42] | 4 | 2.58(1.33-4.99) | 63.2% | 0.043 | Very Lowb,c |
| Yang M 2014 [44] | 6 | 4.02(1.78-9.06) | 53.0% | 0.06 | Very Lowb,c |
| Cai R 2017 [45] | 7 | 2.76(1.89-4.02) | 29.0% | 0.21 | Lowb |
| **Fever** |  |  |  |  |  |  |
| Li D 2021 [34] | 10 | 1.00(0.91-1.11) | 0% | 0.75 | Higha | Higha |
| **Abdominal pain** |  |  |  |  |  |  |
| Li D 2021 [34] | 7 | 1.03(0.91-1.16) | 0% | 0.84 | Higha | Higha |
| **Anorexia** |  |  |  |  |  |  |
| Li D 2021 [34] | 6 | 1.17(0.96-1.43) | 0% | 0.68 | Higha | Higha |
| **ALT elevation** |  |  |  |  |  |  |
| Li D 2021 [34] | 3 | 1.67(0.71-3.89) | 92% | 0.00001 | Lowa,d | Lowa,h |
| **AST elevation** |  |  |  |  |  |  |
| Li D 2021 [34] | 3 | 1.86(0.47-7.37) | 98% | 0.00001 | Lowa,d | Lowa,h |
| **Leukopenia** |  |  |  |  |  |  |
| Li D 2021 [34] | 4 | 1.12(0.89-1.40) | 0% | 0.96 | Higha | Higha |
| **Oral mucosal inflammation** | |  |  |  |  |  |
| Li D 2021 [34] | 5 | 3.46(2.34-5.11) | 20% | 0.29 | Higha | Higha |
| **Elevated bilirubin** | |  |  |  |  |  |
| Li D 2021 [34] | 3 | 1.43(1.11-1.83) | 0% | 0.48 | Higha | Higha |
| **Grade 1/2 adverse event** | |  |  |  |  |  |
| **Fatigue** |  |  |  |  |  |  |
| Xie Y 2021 [36] | 2 | 0.97 (0.82–1.14) | — | 0.891 | Higha | High |
| **Nausea** |  |  |  |  |  |  |
| Xie Y 2021 [36] | 2 | 1.06 (0.83–1.37) | —- | 0.652 | Higha | High |
| **Hand-Foot skin reaction** | |  |  |  |  |  |
| Xie Y 2021 [36] | 2 | 4.28 (2.48–7.36) | -— | 0.582 | Moderatea,c | Moderate |
| **Diarrhea** |  |  |  |  |  |  |
| Xie Y 2021 [36] | 2 | 1.74 (1.07–2.81) | — | 0.265 | Moderatea,c | Moderate |
| **Alopecia** |  |  |  |  |  |  |
| Xie Y 2021 [36] | 2 | 1.55 (0.83–2.89) | — | 0.652 | Higha, | High |
| **Grade 3/4 adverse event** | |  |  |  |  |  |
| **Fatigue** |  |  |  |  |  |  |
| Zhang L 2014 [39] | 2 | 1.02(0.99-1.05) | 0.0% | 0.851 | Lowb | low |
| Yang M 2014 [44] | 4 | 2.36(1.07- 5.17) | 0.0% | 0.74 | Lowb |
| Xie Y 2021 [36] | 3 | 1.55(1.01–2.36) | — | 0.686 | Higha |
| **Nausea** |  |  |  |  |  |  |
| Yang M 2014 [44] | 3 | 2.99(0.32-28.29) | 0.0% | 1 | Very Lowb,e | low |
| Xie Y 2021 [36] | 3 | 1.75(0.36–8.43) | — | 0.866 | Higha |
| **Hematological events** | |  |  |  |  |  |
| Yang M 2014 [44] | 3 | 1.89(0.48-7.40) | 3.0% | 0.31 | Lowb | Moderate |
| Xie Y 2021 [36] | 2 | 1.73 (0.74–4.08) | — | 0.496 | Moderatea,c |
| **Anorexia** |  |  |  |  |  |  |
| Yang M 2014 [44] | 3 | 1.60(0.12-21.85) | 49.0% | 0.16 | Very Lowb | Very Low |
| Xie Y 2021 [36] | 3 | 1.39(0.45–4.34) | — | 0.56 | Lowa,c |
| **Hand-foot skin reaction** | |  |  |  |  |  |
| Zeng J 2016 [38] | 4 | 18.95(1.71-210.12) | — | — | Modcratca | Moderate |
| Zhang L 2014 [39] | 3 | 1.15(0.90-1.48) | 97.8% | 0.00 | VeryLowb,d |
| Yang M 2014 [44] | 6 | 10.89(4.13-28.75) | 0.0% | 0.59 | Lowb |
| Xie Y 2021 [36] | 5 | 31.57(10.9-91.07) | — | 0.102 | Moderatea,c |
| **Rash** |  |  |  |  |  |  |
| Zeng J 2016 [38] | 3 | 11.55(2.19-60.89) | — | — | Moderatea,e | Moderate |
| Zhang L 2014 [39] | 2 | 1.05(1.01-1.09) | 13.1% | 0.283 | Lowb |
| Yang M 2014 [44] | 4 | 7.80(1.80-33.73) | 0.0% | 0.99 | Very Lowb,e |
| Xie Y 2021 [36] | 4 | 8.24(1.53–44.44) | — | 0.991 | Moderatea,e |
| **Diarrhea** |  |  |  |  |  |  |
| Zeng J 2016 [38] | 4 | 5.96(1.93-18.40) | — | — | Moderatea | Moderate |
| Zhang L 2014 [39] | 3 | 1.05(1.02-1.07) | 0.0% | 0.776 | Lowb |
| Yang M 2014 [44] | 5 | 5.90(1.89-18.48) | 0.0% | 0.92 | Lowb |
| Xie Y 2021 [36] | 4 | 4.82(2.22–10.49) | — | — | Moderatea,e |
| **Hypertension** |  |  |  |  |  |  |
| Zhang L 2014 [39] | 2 | 1.07(0.93-1.25) | 96.4% | 0.00 | Very Lowb,d | Very Low |
| Yang M 2014 [44] | 6 | 4.15(1.25-13.71) | 33.0% | 0.21 | Very Lowb,e |
| Xie Y 2021 [36] | 2 | 3.65(2.14–6.21) | — | 0.002 | Lowa,e |

Notes: a, All Meta-analyses included only RCTs; b, Both RCTs and None-RCTs were included in meta-analyses; c, Inconsistency(small P value from a test for heterogeneity or a high I2 value, 50%＜I2≤75%); d, Severe inconsistency（75%＜I2）; e, Imprecision (wide 95% confidence interval around the estimate of the effect); CI: confidence interval.
